# Supplementary material for: The leukodystrophy mutation Polr3b R103H causes homozygote mouse embryonic lethality and impairs RNA polymerase III biogenesis
Source: PubMed Central journal article supplement (PMC6587292; doi:10.1186/s13041-019-0479-7), 2019-06-20
Supplement: 13041_2019_479_MOESM1_ESM.pdf [file 13041_2019_479_MOESM1_ESM.pdf]

## Supplementary Figure 1

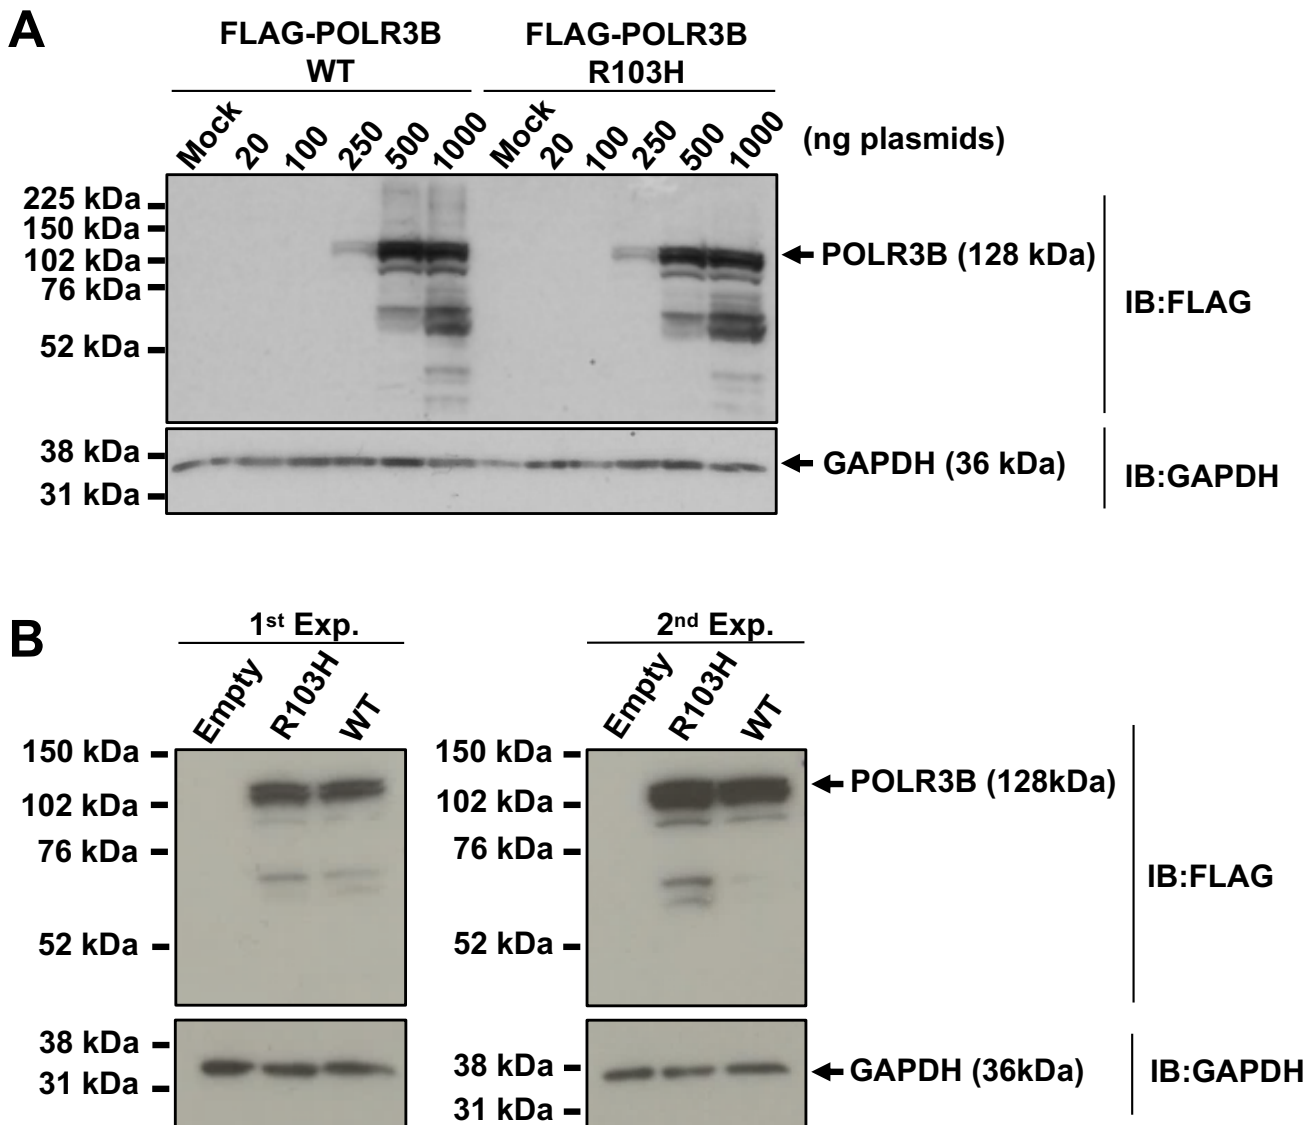

**Supplementary Figure 1. FLAG-POLR3B R103H expression level is similar to FLAG-POLR3B WT.** A) Protein expression of the FLAG-POLR3B WT or the R103H mutant was assessed by immunoblot following transfection of various quantity of plasmid in HEK 293S as indicated and B) 500ng of either FLAG-POLR3B WT, or R103H mutant, or FLAG-empty vector expressing plasmid was transfected in HEK293S in two independent experiments. 30 $\mu$ g of whole cell protein extracts were loaded and FLAG-POLR3B WT or R103H were detected using anti-FLAG (M2) antibody. GAPDH was used as a loading control. IB: immunoblot; WT: wild-type; Empty: FLAG-empty vector negative control.
